# Supplementary material
Source: Springer Nature journal article supplement (https://www.springermedizin.de/resource/supplementary/12891_2008_578_MOESM5_ESM.pdf/9511376)
Supplement: MOESM5 [file 9511376]

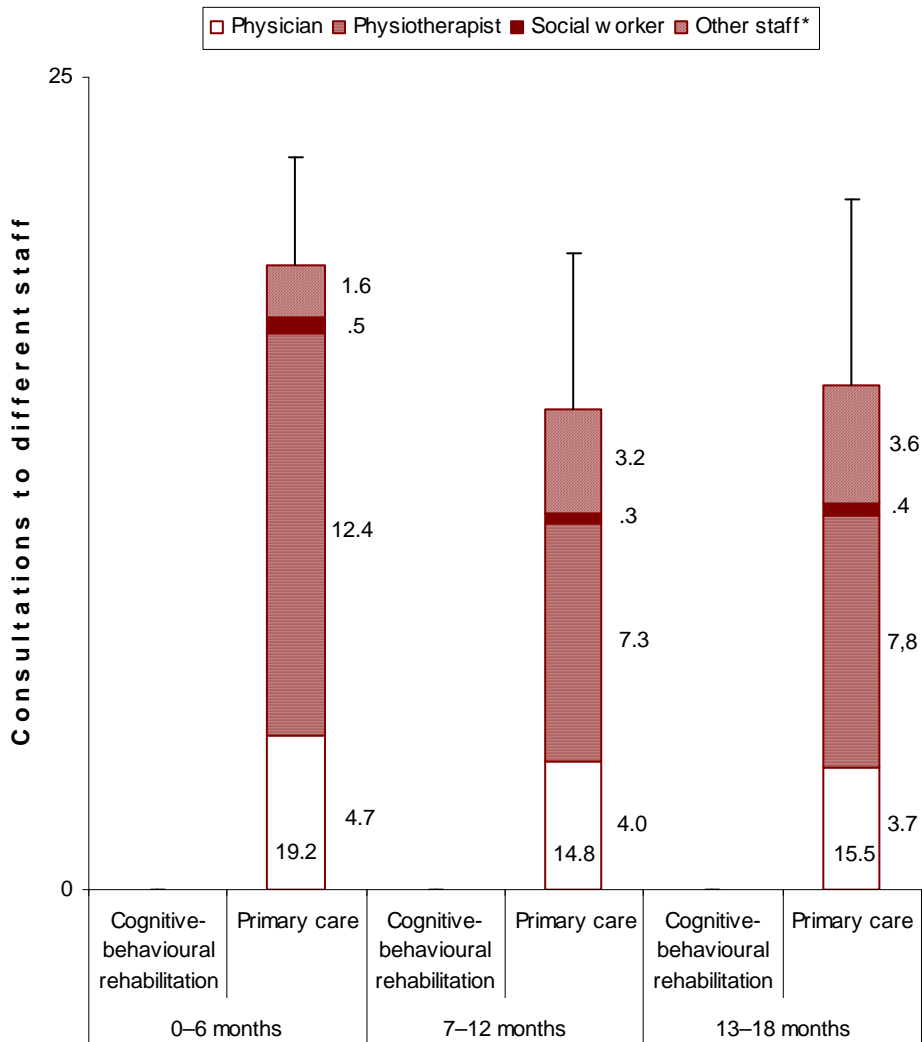

\*= Occupational therapist, nurse, X-ray/MRI staff, laboratory personnel, and complementary-medicine staff (for example, masseur and “Chinese doctor”)
